# Supplementary material for: De novo synthesized polyunsaturated fatty acids operate as both host immunomodulators and nutrients for Mycobacterium tuberculosis
Source: eLife journal article supplement (doi:10.7554/elife.71946), 2021-12-24
Supplement: fig4-figsupp1-data3 [file elife-71946-fig4-figsupp1-data3-v2.pdf]

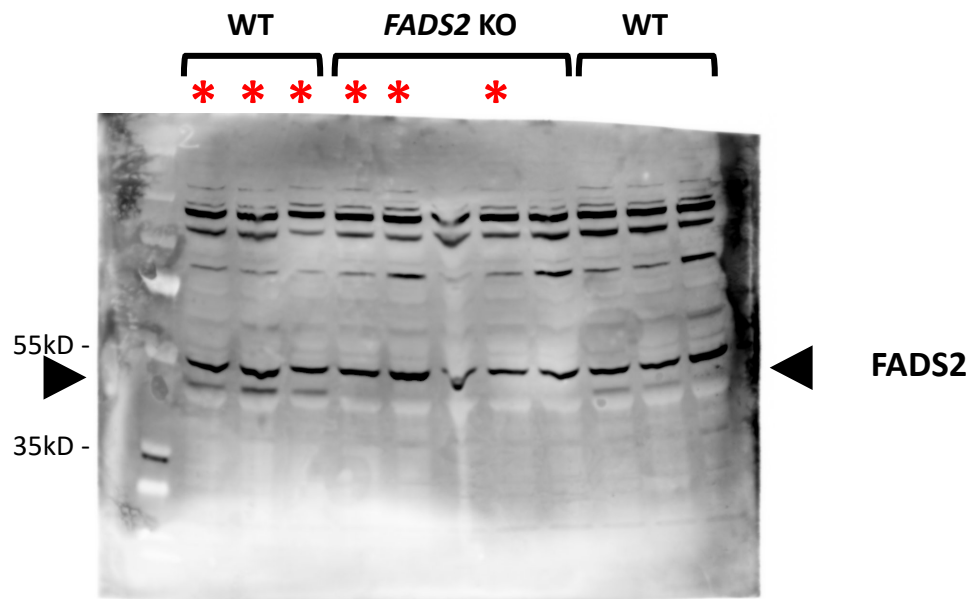

The same blot was stripped after FADS2 detection, and incubated with anti-GAPDH antibody followed by the secondary antibody:

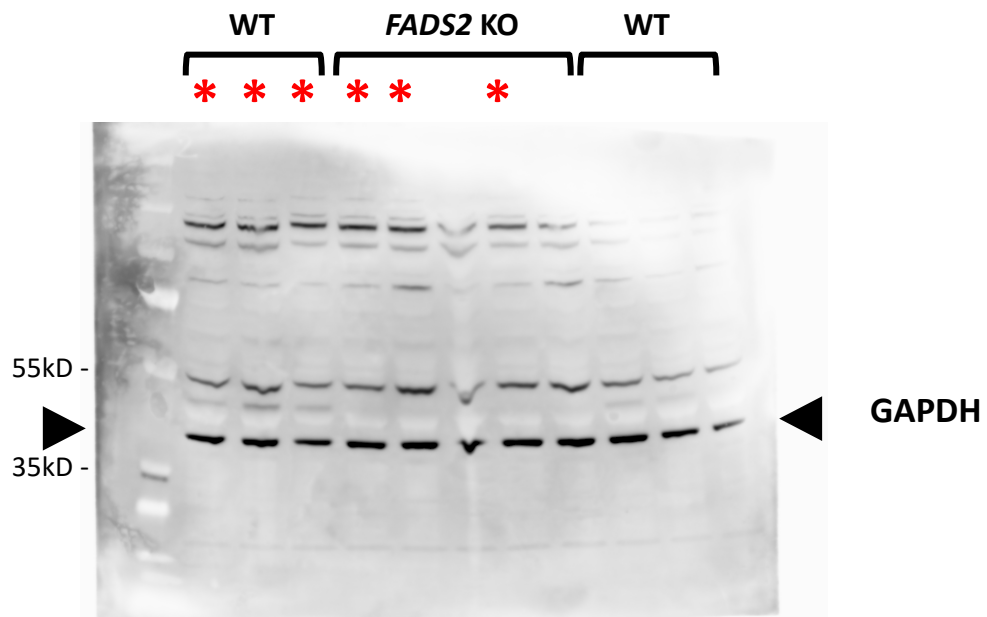

\* : independent clones selected for the study
