# Supplementary material for: De novo synthesized polyunsaturated fatty acids operate as both host immunomodulators and nutrients for Mycobacterium tuberculosis
Source: eLife journal article supplement (doi:10.7554/elife.71946), 2021-12-24
Supplement: supp [file Figure 3 - Source data 1.xlsx]

## Sheet: Source data NanoString
Probe Name	Accession #	NS Probe ID	Class Name	NI Ctrl 6h_1	NI Ctrl 6h_2	NI Ctrl 6h_3	Mtb Veh 6h_1	Mtb Veh 6h_2	Mtb Veh 6h_3	Mtb iFADS2 6h_1	Mtb iFADS2 6h_2	Mtb iFADS2 6h_3		NI Ctrl 24h_1	NI Ctrl 24h_2	NI Ctrl 24h_3	Mtb Veh 24h_1	Mtb Veh 24h_2	Mtb Veh 24h_3	Mtb iFADS2 24h_1	Mtb iFADS2 24h_2	Mtb iFADS2 24h_3
Acot1	NM_012006.2	NM_012006.2:1221	Endogenous	156.4	171.36	157.82	63.79	75.23	98.97	76.06	80.83	88.56		98.54	93.78	113.56	19.59	32.89	30.89	57.8	57.88	57.33
Acot2	NM_134188.3	NM_134188.3:42	Endogenous	287.7	329.54	264.23	199.77	227.68	177.16	189.98	181.34	170.49		177.46	194.34	162.46	95.1	98.31	109.06	142.77	155.65	141.14
Acox1	NM_015729.2	NM_015729.2:2141	Endogenous	2418.76	2312.34	2367.19	2477.38	2340.74	2185.22	2041.86	2192.52	2095.35		2094.45	2113.61	2036.45	1986.91	2027.17	1990.3	1882.13	1927.2	2114.33
Acox3	NM_030721.2	NM_030721.2:1198	Endogenous	1277.48	1473.08	1419.38	935.28	1101.98	965.24	935.19	1187.45	937.04		625.28	781.48	794.11	457.7	466.93	455.38	621.29	631.78	543.44
Aim2	NM_001013779.2	NM_001013779.2:1134	Endogenous	1742.08	1982.88	1907.54	1519.36	1623.94	1588.26	1432.85	1620.56	1622.61		1114.39	1223.72	1211.21	1156.34	1286.39	1269.91	1280.97	1334.73	1415.09
Alox5	NM_009662.2	NM_009662.2:1975	Endogenous	125.26	114.94	s	86.97	79.27	80.36	67.49	68.4	64.07		82.94	100.27	100.59	79.33	81.51	76.28	144.37	129.25	154.31
Atg5	NM_001314013.1	NM_001314013.1:262	Endogenous	4331.84	4613.51	4707.11	4846.16	4633.51	4836.15	4472.78	4975.65	4646.45		4207.82	4418.91	4500.18	3760.9	3862.34	3862.29	3900.43	4046.81	4262.32
Camp	NM_009921.2	NM_009921.2:355	Endogenous	6.59	1.09	9.72	57.61	36.87	49.33	29.8	21.77	40.53		16.87	4.03	10.78	36.19	38.19	56.1	44.18	33.44	36.98
Casp1	NM_009807.2	NM_009807.2:259	Endogenous	4351.2	4460.37	5212.83	5292.72	5153.45	6206.3	4762.3	4701.07	5070.22		6315.69	6787.99	7208.39	7321.33	7532.66	7392.76	6850.14	6611.26	6865.3
Ccl2	NM_011333.3	NM_011333.3:415	Endogenous	2522.29	3764.17	4187.13	18522.7	16239.7	19488.3	15134.4	14349.8	16456.5		6272.56	5984.6	6839.18	44046.6	46414.1	47070.2	31650.1	26379	32219.8
Ccl3	NM_011337.1	NM_011337.1:60	Endogenous	9308.53	11397.1	12588	67292.1	60171.8	66666.5	51206.7	47926.5	46570.6		47965.5	52205.1	55275.6	51685.2	44693	49900.5	31918.6	27208	30653.7
Ccl5	NM_013653.1	NM_013653.1:165	Endogenous	1175.64	1310.87	1327.23	2118.9	1928.83	2130.61	1943.36	1949.03	1874.99		870.29	939.34	890.9	2158.67	2184.52	2651	1571.93	1804.01	1601.87
Cd36	NM_007643.3	NM_007643.3:1520	Endogenous	36935.8	38279.8	38398.4	45282.3	34378.9	40576.6	37032.3	40650.6	39976.7		44028.8	47312.3	46242.9	39312.9	40617.8	40322.8	38122.6	36427.6	39513.8
Cd54	NM_010493.2	NM_010493.2:2195	Endogenous	3018.02	2707.29	3019.91	8335.21	8293.26	7397.73	6604.76	6175.52	6609.93		7359.07	6833.41	7151.51	7307.23	7045.58	7605.43	6213.7	6146.87	6707.25
Cd64	NM_010186.5	NM_010186.5:185	Endogenous	6870.26	8450.14	9762.13	10022.6	8820.27	10782.1	10031	9900.51	10136.6		5617.35	4950.9	5156.77	14345.1	15128.8	15510.3	12411.3	11303.1	12588.5
Cd86	NM_019388.3	NM_019388.3:251	Endogenous	1003.95	1422.7	1215.33	1281.4	1553.27	1353.7	1763.48	2260.91	1716.78		539.94	637.66	599.52	256.07	290.13	288.95	262.2	278.83	293.2
Cebpb	NM_009883.3	NM_009883.3:1147	Endogenous	4187.08	4653.81	4405.43	11181.5	11297.8	10849.2	11502.6	12855.6	10855.2		6488.21	7095.08	6801.26	11217	11050.1	12158.9	10885.1	9571.68	10439.3
Ch25h	NM_009890.1	NM_009890.1:487	Endogenous	118.53	130.05	136.97	598.43	649.69	622.71	408.4	348.16	381.43		277.48	297.06	309.14	217.07	190.24	178.83	134.75	115.56	147.13
Ciita	NM_007575.2	NM_007575.2:1358	Endogenous	64.66	63.56	65.67	20.52	15.67	7.13	13.53	14.52	16.99		7.69	6.2	9.78	3	2.83	1	3.3	8.02	1.2
Cish	NM_009895.3	NM_009895.3:1541	Endogenous	1	4.11	8.62	14.34	11.63	12.1	10.1	9.34	8.51		11.36	4.03	10.78	2.17	1	10.71	1.69	7.04	4.65
Clec4e	NM_019948.2	NM_019948.2:685	Endogenous	665.6	701.32	733.75	7332.38	7383.63	8101.42	6373.49	7057.29	5558.03		1357.57	1157.76	1293.04	8135.31	8063.94	9111.77	6761.16	5893.65	5958.93
Cpt1a	NM_013495.1	NM_013495.1:2475	Endogenous	2418.76	2646.84	2456.05	1782.04	1878.35	1760.77	1547.63	1764.59	1556.69		1152.02	1286.43	1293.04	1265.04	1373.9	1298.49	1240.89	1165.59	1229.51
Cxcl10	NM_021274.1	NM_021274.1:115	Endogenous	184.18	236.85	394.77	5839.72	4850.58	5785.58	4136.15	5020.2	3862		872.13	616.04	785.13	1422.69	1079.53	1192.58	774.39	766.7	888.27
Cxcl3	NM_203320.2	NM_203320.2:275	Endogenous	13.32	34.34	4.23	122.51	90.38	97.73	64.92	82.9	50.89		195.81	111.08	72.65	3307.03	3390.28	3765.62	2104.96	1331.8	1702.45
Cybb	NM_007807.2	NM_007807.2:1535	Endogenous	20576.6	21596.2	21749.1	33787.6	32325.5	33373.4	30953.3	32934.3	28138.5		15913.5	16027.5	16452.6	24230.7	26291.8	28700.8	27000.3	27467.1	24198.9
Cyp27a1	NM_024264.3	NM_024264.3:1725	Endogenous	297.8	343.65	320.17	124.05	131.77	125.04	101.75	131.6	104.57		116.89	185.69	156.47	26.23	39.08	31.73	51.39	103.83	78.88
Cyp27b1	NM_010009.2	NM_010009.2:272	Endogenous	1.54	2.1	2.04	8.16	7.59	1.24	7.53	2.08	1.92		2.19	1.08	1	1	1	9.87	1	1	1.2
Defb1	NM_007843.3	NM_007843.3:157	Endogenous	8.27	7.14	7.53	20.52	17.69	5.89	12.67	4.16	9.45		1	7.28	9.78	13.78	9.02	14.92	12.92	13.88	14.23
Elovl5	NM_134255.3	NM_134255.3:398	Endogenous	343.25	335.59	348.7	341.92	305.42	321.13	339.02	345.05	308.92		296.76	293.82	287.19	279.3	319.3	262.05	250.98	255.37	259.68
Elovl6	NM_130450.2	NM_130450.2:4195	Endogenous	38.57	49.45	40.44	71.52	51	51.81	52.07	53.89	57.48		38.89	50.53	39.72	49.46	46.15	45.18	48.18	38.33	44.16
Fads1	NM_146094.2	NM_146094.2:2365	Endogenous	3499.45	3453.86	3477.36	2155.98	2193.34	2049.94	2222.6	2352.09	2157.5		1258.46	1505.93	1510.57	1006.16	1130.81	1124.49	1365.93	1682.78	1503.69
Fads2	NM_019699.1	NM_019699.1:460	Endogenous	122.74	117.96	102.97	213.67	167.11	159.79	171.99	198.95	168.6		84.78	88.37	78.64	149.86	146.04	142.69	115.51	144.89	130.37
Fasn	NM_007988.3	NM_007988.3:6560	Endogenous	561.24	518.96	518.73	1111.43	885.93	859.75	934.33	1104.56	905.02		684.93	715.52	635.45	708.28	731.24	721.85	558.77	504.68	628.45
Gbp1	NM_010259.2	NM_010259.2:166	Endogenous	19.21	17.21	14.11	20.52	25.76	24.51	23.81	16.59	19.81		14.12	21.33	36.73	32.87	26.7	21.64	26.54	36.37	27.4
Gbp6	NM_194336.2	NM_194336.2:3939	Endogenous	88.23	139.12	166.59	346.56	375.08	452.68	401.55	374.07	396.5		176.54	130.54	152.48	283.45	370.57	334.34	310.29	319.9	350.67
Gbp7	NM_001083312.1	NM_001083312.1:2291	Endogenous	225.42	276.14	361.86	714.32	636.56	683.52	506.91	516.02	578.25		305.93	293.82	315.13	875.89	875.33	863.07	583.62	575.07	711.07
Gpx3	NM_008161.2	NM_008161.2:27	Endogenous	30.16	22.25	26.17	35.98	23.74	35.68	34.09	33.17	31.11		37.98	28.9	28.74	37.85	52.34	37.61	33.76	29.53	35.78
Gpx4	NM_008162.3	NM_008162.3:613	Endogenous	9710	10207.3	9729.22	9053.73	9282.66	9487.7	9911.08	11180.2	9083.81		9471.52	10367	9826.79	7343.73	7912.78	7699.58	8517.36	9032.98	7881.82
Hif1a	NM_010431.2	NM_010431.2:1294	Endogenous	5031.25	5087.05	5568.26	11864.4	10211.5	10581.1	9819.43	10866.2	9338.07		6076.18	6265.73	6470.96	9548.36	9420.87	9789.28	9249.17	9122.92	9698.16
Ifnb	NM_010510.1	NM_010510.1:335	Endogenous	1	1.01	6.43	42.16	24.75	33.2	32.37	52.86	26.4		16.87	9.44	5.79	34.53	48.8	35.09	22.53	18.77	27.4
Ifng	NM_008337.1	NM_008337.1:95	Endogenous	1	2.1	1.1	1.55	2.54	1.24	1	5.19	2.86		4.94	2.95	4.79	1	1.07	1	1	8.99	1.2
Ifngr1	NM_010511.2	NM_010511.2:985	Endogenous	9062.77	8905.54	9187.29	7227.31	7294.78	7176.82	6355.5	6154.8	6109.88		6719.46	7021.55	6766.33	4590.65	4853.29	4702.04	5616.55	6338.49	5840.39
Ifngr2	NM_008338.3	NM_008338.3:797	Endogenous	8424.79	8701.02	8552.12	10124.5	9986.34	9393.38	9296.07	9840.42	8979.28		8191.39	8628.33	8636.33	8665.51	8532.46	8390.54	8135.82	8021.08	8263.77
Il10	NM_010548.1	NM_010548.1:985	Endogenous	333.15	338.61	428.78	1069.71	1027.27	1100.52	965.17	942.92	1046.28		1184.13	1259.4	1326.97	1177.08	978.76	1100.96	707.86	615.16	653.6
Il12a	NM_008351.1	NM_008351.1:355	Endogenous	4.07	1.01	8.62	34.43	17.69	23.27	13.53	13.48	15.1		10.45	18.09	14.77	64.4	46.15	74.6	31.35	26.59	26.2
Il12b	NM_001303244.1	NM_001303244.1:414	Endogenous	35.21	47.44	68.96	100.87	128.74	194.54	118.89	101.56	89.5		174.71	138.11	162.46	181.39	202.62	159.5	63.41	68.63	74.09
Il18	NM_008360.1	NM_008360.1:270	Endogenous	305.38	328.53	384.9	579.88	523.49	622.71	485.49	467.32	418.16		639.96	565.22	692.32	665.96	634	673.1	509.07	464.59	518.3
Il1b	NM_008361.3	NM_008361.3:1120	Endogenous	251.51	261.03	308.11	1666.16	1575.48	1479.05	1297.51	938.77	1100.9		1731.06	1670.29	1850.85	2555.29	2721.1	2906.54	2137.82	2023.01	2109.54
Il6	NM_031168.1	NM_031168.1:40	Endogenous	7.43	6.13	10.82	145.68	138.84	165.99	143.73	141.97	113.98		82.94	82.97	88.62	209.6	215.88	242.72	121.93	62.77	131.56
Irak3	NM_028679.3	NM_028679.3:2608	Endogenous	3296.61	3243.29	3373.15	7088.24	7233.2	6890.13	6501.11	7091.49	6846.3		5920.18	5796.46	5900.18	6806.06	6738.84	7278.44	7020.87	6530.12	7285.56
Irf1	NM_008390.1	NM_008390.1:365	Endogenous	2114.09	2406.04	2527.35	3912.87	3797.58	4156.04	3593.09	3816.19	3338.41		1954.05	1842.21	1977.57	1689.86	1822.09	1780.15	1776.33	1910.58	1914.38
Irf3	NM_016849.4	NM_016849.4:526	Endogenous	1848.12	1860.97	1902.06	1938.11	2036.86	2027.6	1902.24	2017.41	1957.86		1854.94	2013.05	1995.54	1767.86	1763.74	1664.15	1666.51	1600.66	1526.44
Irf7	NM_016850.2	NM_016850.2:705	Endogenous	2228.55	4201.44	4046.71	4830.71	5335.18	5433.11	5850.98	5326.91	5724.71		1955.89	1808.69	1834.88	4694.36	4934.62	5495.56	3992.61	4308.83	4141.39
Irg1	NM_008392.1	NM_008392.1:2105	Endogenous	371.87	501.83	608.69	10034.9	8100.43	9791.76	7929	8238.51	7309.62		1443.83	1241.02	1339.94	5456.07	5304.12	5932.66	4431.86	3708.53	4196.47
Irgm1	NM_008326.1	NM_008326.1:27	Endogenous	5087.64	6760.53	9752.25	17000.7	13521.9	17593.2	14985.3	14319.7	14584.4		6181.71	5307.72	5919.14	8010.85	8825.94	8308.17	7608.4	8487.43	8505.63
Irgm2	NM_019440.2	NM_019440.2:2555	Endogenous	973.65	969.32	1235.08	2120.44	1918.74	2258.44	1997.32	1789.46	1976.69		1096.04	1026.93	1069.52	1199.49	1120.2	1084.99	1115.85	1125.5	1160.06
Jak1	NM_146145.2	NM_146145.2:4080	Endogenous	7092.46	7320.71	7449.63	7516.26	7660.25	7495.77	6867.72	7629.25	6790.73		6658.89	7051.83	7202.4	6357.17	6556.74	6468.12	6604.86	6849.82	7072.43
Lipa	NM_021460.3	NM_021460.3:1830	Endogenous	52564.4	55808.6	54149.3	45674.8	46781.7	45147.5	48422	52587.2	45392.5		37632.7	40940.3	41061	20402.2	23107.7	22920.1	25753.1	28419.4	26409.2
Lta	NM_010735.2	NM_010735.2:776	Endogenous	1	1.01	5.33	8.16	8.6	5.89	2.39	16.59	4.74		8.61	9.44	8.79	10.46	1	10.71	4.9	8.02	9.44
Ltb	NM_008518.2	NM_008518.2:163	Endogenous	1058.66	1050.93	1314.06	2477.38	2562.85	2810.72	2397.34	2256.77	2418.36		2199.98	2366.63	2486.49	1346.35	1141.41	1137.94	1279.36	1109.86	1170.84
Ltb4r1	NM_008519.2	NM_008519.2:125	Endogenous	11.64	9.15	16.3	9.71	14.66	10.86	5.82	6.23	16.05		2.19	9.44	9.78	17.1	14.33	18.28	9.71	14.86	9.44
Ltb4r2	NM_020490.2	NM_020490.2:788	Endogenous	4.07	1.09	6.43	1.55	1.53	1.24	5.82	1.05	4.74		1	5.12	3.8	1	1	1	1.69	1	1.2
Ltbr	NM_010736.3	NM_010736.3:1962	Endogenous	2159.54	2156.17	2305.76	2324.41	2187.29	2175.29	2091.54	2161.44	2048.26		2000.85	2107.13	2217.06	2191.03	2134.14	2079.4	2202.75	2155.98	2170.6
Lxra (Nr1h3)	NM_001177730.1	NM_001177730.1:1636	Endogenous	1501.36	1673.57	1633.29	3796.98	3698.64	3755.18	4049.64	3959.18	3926.04		2285.33	2259.59	2408.65	3480.45	3316.03	3823.62	2880.06	2828.62	2570.51
Lxrb (Nr1h2)	NM_009473.2	NM_009473.2:1015	Endogenous	1568.7	1713.87	1572.96	1701.69	1754.17	1699.96	1597.31	1788.42	1632.03		1614.52	1728.68	1750.06	1485.75	1433.13	1479.22	1520.63	1467.69	1528.84
Map1Lc3b	NM_026160.4	NM_026160.4:1240	Endogenous	4874.71	5228.1	4735.63	3790.8	4259.97	3745.25	3996.53	4563.26	3965.59		3496.64	3863.13	3700.89	2442.44	2466.52	2524.91	2589.9	2712.28	2709.4
Mapk1	NM_011949.3	NM_011949.3:1210	Endogenous	6163.28	6144.94	6931.84	7225.76	6693.07	7047.75	6001.74	6264.63	6312.34		6524	6876.66	7122.57	7086.51	6946.58	6891.77	7013.65	6887.95	7125.12
Mapk14	NM_011951.2	NM_011951.2:1420	Endogenous	5548.87	5476.96	5397.13	4473.77	4493.18	4303.73	3893.75	4034.82	4002.32		3874.71	4010.18	3979.29	3713.61	3916.26	3703.42	4245.9	4762.47	4773.58
Marco	NM_010766.2	NM_010766.2:350	Endogenous	73049.4	51462.1	54499.2	83821	68593.8	64407.7	58851.5	59580.2	60446.8		60802.7	58892.8	61599.1	148851	150370	155334	132491	122972	139447
Mrc1	NM_008625.1	NM_008625.1:3992	Endogenous	2731.02	2885.62	2852.07	2180.7	2169.11	2175.29	1977.62	2425.66	1713.96		1956.8	2135.24	2233.03	437.78	594.22	451.18	848.93	1179.28	1115.76
Myd88	NM_010851.2	NM_010851.2:1595	Endogenous	5153.29	5298.62	5812.89	7596.61	7416.94	7488.33	6641.59	5656.41	6827.46		5454.01	5181.21	5531.97	6816.02	6776.85	7216.24	6468.6	6366.84	7002.99
Ncf4	NM_008677.2	NM_008677.2:741	Endogenous	10731.8	11549.3	12407	16991.4	16785.9	17832.7	15980.7	18061.3	16029		12677.8	13046.5	13694.5	12957	13093.9	13487	13110.2	12790.2	12265.2
Nfkb1	NM_008689.2	NM_008689.2:2125	Endogenous	4171.08	4226.62	4703.82	8577.81	8399.27	8245.38	6638.16	6964.04	6120.23		5717.38	5911.07	6218.5	5496.73	5613.52	5762.02	5109.97	4803.54	5173.48
Nfkb2	NM_019408.2	NM_019408.2:1150	Endogenous	1333.88	1420.69	1581.73	5960.25	5672.38	5089.33	4504.47	4530.1	3957.12		5296.17	4948.73	5063.97	4023.93	3958.69	4031.25	3474.01	3473.89	3415.82
Nlrp3	NM_145827.3	NM_145827.3:508	Endogenous	480.44	613.66	583.45	1982.92	1918.74	1641.63	1327.49	1417.48	1159.29		633.54	613.88	625.47	1090.79	1096.33	1214.44	911.45	785.27	891.86
Nod1	NM_172729.2	NM_172729.2:1446	Endogenous	589.86	571.35	629.53	1023.35	1060.59	822.52	910.35	885.93	785.43		638.13	660.37	711.28	785.44	840.86	823.56	796.83	771.58	723.04
Nod2	NM_145857.2	NM_145857.2:1086	Endogenous	70.56	83.71	83.22	250.76	234.75	239.22	220.82	232.11	167.66		107.72	129.46	130.53	203.79	182.28	175.47	169.22	166.4	153.12
Nos2	NM_010927.3	NM_010927.3:3715	Endogenous	9.96	11.17	15.2	52.97	46.96	61.74	39.23	35.24	23.58		28.8	25.66	21.76	117.5	89.47	109.06	73.03	57.88	81.28
Nox1	NM_172203.1	NM_172203.1:475	Endogenous	110.11	124.01	153.43	405.28	362.96	394.35	267.07	214.5	274.07		542.69	487.37	587.55	124.97	148.69	113.26	97.88	94.05	82.47
Plin2	XM_003945761.4	XM_003945761.4:152	Endogenous	9135.99	11559.4	10294.2	7785.12	8183.22	8523.38	8886.63	9988.59	7963.17		6781.86	6704.73	6566.76	7648.25	7898.64	8247.64	7200.41	7169.52	7202.94
Pnpla2	NM_025802.2	NM_025802.2:669	Endogenous	2295.88	2535	2133.53	1885.57	2136.81	1820.34	1889.4	2358.31	1923.02		1888.9	2191.47	1964.6	1742.14	1785.84	1775.95	1785.14	1794.24	1763.51
Ppara	NM_011144.2	NM_011144.2:1345	Endogenous	1	1.01	1.1	1.55	1.01	1.24	1	1.05	1		1	1.08	1	1	1	1	1	1	1.2
Pparg	NM_011146.1	NM_011146.1:1060	Endogenous	149.67	203.6	183.05	131.78	141.87	138.69	184.84	190.66	150.71		238.03	261.38	250.27	57.76	54.11	77.96	65.82	77.43	75.29
Ptger2	NM_008964.4	NM_008964.4:838	Endogenous	128.63	146.17	141.36	116.33	128.74	103.94	239.66	328.47	208.15		57.25	65.67	51.69	104.22	112.45	129.24	150.78	150.76	145.93
Ptger4	NM_008965.1	NM_008965.1:315	Endogenous	418.16	470.6	504.47	822.48	890.98	782.81	669.65	694.24	713.86		617.94	568.46	602.52	610.37	683.51	611.73	691.83	811.67	797.27
Ptges	NM_022415.2	NM_022415.2:1185	Endogenous	26.79	23.26	19.59	71.52	93.41	67.95	92.33	105.7	66.9		29.72	24.58	23.75	156.5	139.85	214.14	90.67	70.59	114.8
Ptgs2	NM_011198.3	NM_011198.3:675	Endogenous	97.49	102.85	129.29	1984.46	1667.35	1846.41	1455.12	1527.31	1344.8		512.41	423.57	443.86	3767.54	3982.56	4602.85	2578.68	1858.76	2182.57
Scd1	NM_009127.3	NM_009127.3:2295	Endogenous	13.32	25.27	32.76	42.16	20.72	17.06	28.95	34.2	25.46		15.03	20.25	11.78	22.08	10.79	25	4.9	25.62	20.21
Scd2	NM_009128.2	NM_009128.2:1865	Endogenous	2388.47	2365.74	2486.76	2933.21	2617.37	2567.47	2769.08	3128.18	3072.85		1267.64	1668.13	1401.81	904.93	1029.15	1166.52	1105.43	1088.35	1210.35
Scl40a1	NM_016917.2	NM_016917.2:1716	Endogenous	1784.16	1850.9	1656.33	666.41	793.05	637.6	969.45	1357.38	914.44		1021.71	1416.19	1306.01	353.98	396.21	412.51	524.3	626.89	551.82
Slc11a1	NM_013612.2	NM_013612.2:945	Endogenous	9576.17	9480.83	8955.82	11071.8	10668.8	9729.71	11207	10654.8	11774.3		10942.5	10585.5	10174	14217.3	13570.3	15623.8	13082.2	12424.5	13826.5
Slc11a2	NM_008732.2	NM_008732.2:1610	Endogenous	6456.17	6127.81	6955.98	10104.5	9589.57	9079.39	8323.02	8666.45	8115.73		9855.11	10743.3	10457.4	8875.44	8692.46	8820.92	8282.5	8456.15	8751.08
Socs1	NM_009896.2	NM_009896.2:1020	Endogenous	111.8	144.16	211.57	912.1	714.3	898.23	715.91	685.95	804.26		345.39	310.04	345.07	753.91	732.13	704.2	481.82	424.51	545.84
Socs3	NM_007707.2	NM_007707.2:585	Endogenous	248.99	253.98	300.43	1803.68	1696.63	1760.77	1483.39	1398.83	1392.83		1216.25	1354.55	1283.06	2528.73	2573.48	2442.54	1929.42	1658.34	1744.36
Sod2	NM_013671.3	NM_013671.3:1495	Endogenous	3575.19	3221.12	3533.31	15169.6	12240.8	12844.8	11064	11196.8	10765.7		7705.03	6980.46	7246.31	14145.1	13835.5	15221.2	12840.9	11815.5	12901
Srebf1	NM_011480.1	NM_011480.1:1145	Endogenous	1048.56	1054.96	1067.24	1245.86	1237.27	1116.65	1091.08	1118.03	1051.93		924.44	933.94	911.85	952.22	1063.62	1031.19	906.64	959.3	927.78
Srebf2	NM_033218.1	NM_033218.1:1135	Endogenous	4839.36	4639.71	5028.53	8019.99	7182.72	6834.28	7010.77	8014.7	6749.3		5260.38	5089.3	5377.3	5208.8	5150.31	5338.36	5168.48	5068.49	5099.25
Tbk1	NM_019786.4	NM_019786.4:440	Endogenous	2617.4	2630.72	2634.86	2761.7	2548.72	2620.84	2309.97	2504.41	2483.34		2183.47	2365.55	2314.85	2152.86	2218.11	2329.9	2267.68	2352.49	2425.63
Tnf	NM_013693.2	NM_013693.2:514	Endogenous	1717.67	1981.87	2031.51	11841.3	11095.9	10989.4	9195	8725.51	8288.06		8197.81	9041.38	9111.32	10476	9625.95	9685.89	7961.08	7153.88	7177.8
Tfrc	NM_011638.3	NM_011638.3:1930	Endogenous	9196.59	7938.32	8847.22	9447.75	8448.74	8530.83	7338.83	7549.47	7871.82		8840.17	9290.08	9466.56	9062.13	9682.53	9358.9	11152	12070.6	12497.5
Tgfb	NM_011577.1	NM_011577.1:1470	Endogenous	14093.3	13686.2	13708.1	19219.5	18647.6	17522.4	16762.7	17275.9	16327.5		20948.7	21353.9	21247.4	17671.5	17514.7	17353.7	17500.3	17146.7	17505.9
Tlr2	NM_011905.2	NM_011905.2:255	Endogenous	3437.16	3712.79	3727.48	7865.47	8662.77	7748.95	6697.27	7198.21	6139.07		3030.47	3240.31	3351.64	3206.63	3227.63	3319.27	3522.9	3481.71	3680.42
Tlr4	NM_021297.2	NM_021297.2:2510	Endogenous	4150.89	4279.02	4148.73	2135.89	2183.25	2089.66	2197.76	2405.97	2242.26		1818.24	1925.47	1896.75	1938.79	2061.65	2044.1	2166.68	2185.31	2320.27
Traf6	NM_009424.2	NM_009424.2:980	Endogenous	759.87	774.87	763.36	926.01	909.15	1001.23	822.98	886.96	845.7		711.54	692.81	744.21	593.77	614.56	606.69	572.4	600.49	633.24
Trem1	NM_021406.5	NM_021406.5:1704	Endogenous	1	5.12	1.1	15.89	7.59	17.06	12.67	20.73	4.74		1.27	1.08	2.8	9.63	7.25	6.51	11.31	3.13	1.2
Trif	NM_174989.4	NM_174989.4:2159	Endogenous	1318.73	1382.4	1389.76	1905.66	1710.76	1800.49	1496.23	1613.31	1561.4		1843.93	2115.78	2103.31	1502.34	1530.37	1455.69	1365.13	1324.95	1377.98
Vdr	NM_009504.3	NM_009504.3:2710	Endogenous	3.22	5.12	3.14	5.07	2.54	1.24	1	4.16	1		9.53	1.08	2.8	7.14	3.72	5.67	1	4.11	13.03
G6pdx	NM_008062.2	NM_008062.2:2030	Housekeeping	10779.7	10888.3	11172.9	11535.3	11158.5	10979.5	11729.5	11639.2	11059.5		10651.6	10722.8	11307.6	10541.6	10943.1	10866.9	11678.7	11582.8	12164.6
Hprt	NM_013556.2	NM_013556.2:30	Housekeeping	4258.62	3963.66	4138.86	4407.33	4217.56	4125.02	3930.58	3798.57	4077.66		4899.74	4668.68	4630.9	4779	4714.5	4534.76	4447.89	4515.12	4605.95
Oaz1	NM_008753.4	NM_008753.4:809	Housekeeping	18544.8	18679.5	17227.3	17974.1	18145.8	16927.9	17783.7	17453.1	18437.8		17907.6	18252.8	17030.4	18915.3	18724.9	19369.5	20039.6	19920.4	20130.4
Ppia	NM_008907.1	NM_008907.1:390	Housekeeping	59978.5	60150	65226.9	59127.3	59597.4	66814.1	60292.2	61261.9	59915.6		53160.4	54460.6	56593.8	70247.4	70295.1	69466.9	67895.4	65766.7	62375.5
Rpl19	NM_009078.1	NM_009078.1:20	Housekeeping	93627.8	98591.8	92004.9	88482.9	93935.4	93329.7	96711.4	101133	95962.6		96224.4	96069.4	94726.2	71419	70401.2	72101.3	67642.9	69777.2	67953.8
NEG_A	ERCC_00096.1	ERCC_00096.1:230	Negative	6.83	3.08	3.86	13.28	7.52	5.75	5.79	5.01	2.04		15.38	5.73	6.8	7.61	7.21	4.74	8.11	3.2	3.88
NEG_B	ERCC_00041.1	ERCC_00041.1:440	Negative	1	1.08	1	9.28	1	1	3.79	1	10.04		1	1	5.8	8.61	5.21	1	1	1.2	2.88
NEG_C	ERCC_00019.1	ERCC_00019.1:140	Negative	1	1	1	1	1	1	1	1	1		1	1	1	1	1	1	1	3.2	1
NEG_D	ERCC_00076.1	ERCC_00076.1:355	Negative	1	3.08	3.86	1.28	4.52	8.75	8.79	4.01	3.04		3.38	10.73	2.8	14.61	3.21	18.74	4.11	6.2	6.88
NEG_E	ERCC_00098.1	ERCC_00098.1:785	Negative	12.83	14.08	7.86	5.28	9.52	2.75	13.79	4.01	8.04		1	9.73	7.8	10.61	1.21	12.74	8.11	12.2	6.88
NEG_F	ERCC_00126.1	ERCC_00126.1:220	Negative	20.83	13.08	19.86	8.28	12.52	13.75	16.79	7.01	6.04		17.38	11.73	19.8	6.61	10.21	20.74	13.11	3.2	14.88
NEG_G	ERCC_00144.1	ERCC_00144.1:15	Negative	1	1	1	1	1	1	1	1	1		1	1	1	1	1	1	1	1	1
NEG_H	ERCC_00154.1	ERCC_00154.1:115	Negative	1	1	1	1	1	1	1	1	1		1	1	1	1	1	1	1	1	1
POS_A	ERCC_00117.1	ERCC_00117.1:385	Positive	84396.8	77040.1	62100.9	58232.3	73305.5	59064.8	78548.8	69075	66806		70598.4	68166.7	67429.8	69266.6	68234.2	68201.7	69853.1	68841.2	64439.9
POS_B	ERCC_00112.1	ERCC_00112.1:695	Positive	24159.8	22106.1	18103.9	16390.3	20655.5	17651.8	22047.8	20172	19672		19857.4	19520.7	19644.8	19748.6	19557.2	19030.7	19961.1	19286.2	18085.9
POS_C	ERCC_00002.1	ERCC_00002.1:850	Positive	5886.83	5402.08	4625.86	4215.28	5176.52	4523.75	5599.79	4610.01	4854.04		4935.38	4914.73	5037.8	4972.61	4993.21	4855.74	5051.11	4947.2	4577.88
POS_D	ERCC_00092.1	ERCC_00092.1:540	Positive	1442.83	1338.08	1194.86	1130.28	1241.52	1094.75	1345.79	1209.01	1143.04		1208.38	1159.73	1202.8	1266.61	1198.21	1219.74	1242.11	1240.2	1205.88
POS_E	ERCC_00035.1	ERCC_00035.1:485	Positive	291.83	287.08	207.86	206.28	240.52	222.75	294.79	244.01	216.04		224.38	235.73	236.8	229.61	192.21	221.74	248.11	247.2	192.88
POS_F	ERCC_00034.1	ERCC_00034.1:195	Positive	110.83	91.08	63.86	88.28	85.52	59.75	83.79	72.01	88.04		88.38	89.73	97.8	84.61	84.21	93.74	111.11	83.2	84.88
