# Supplementary material for: De novo synthesized polyunsaturated fatty acids operate as both host immunomodulators and nutrients for Mycobacterium tuberculosis
Source: eLife journal article supplement (doi:10.7554/elife.71946), 2021-12-24

primers    1+kmR   4+kmF   1+7                      1, 3, 5: Mutant  
                 1   2   3   4   5   6   Ladder                      2, 4, 6: WT

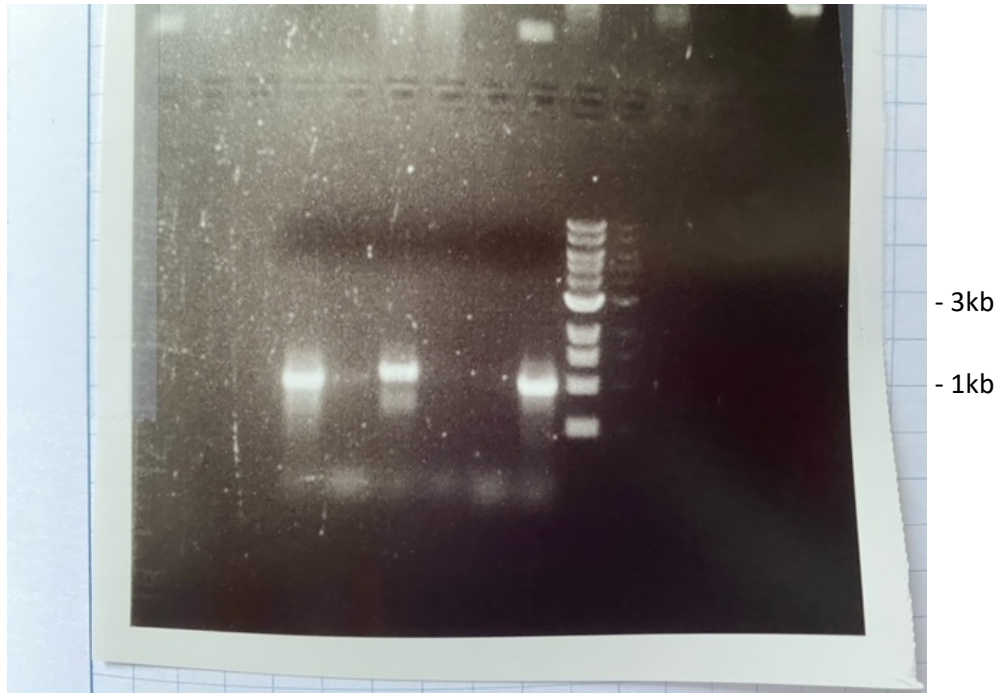

Supplement: supp [file Figure 5 – figure supplement 1 – source data 2.pdf › Source Data/Figure 5 – figure supplement 1 – source data 2.pdf]
