# Supplementary figures and images for: De novo synthesized polyunsaturated fatty acids operate as both host immunomodulators and nutrients for Mycobacterium tuberculosis
Source: eLife journal article supplement (doi:10.7554/elife.71946), 2021-12-24

**A**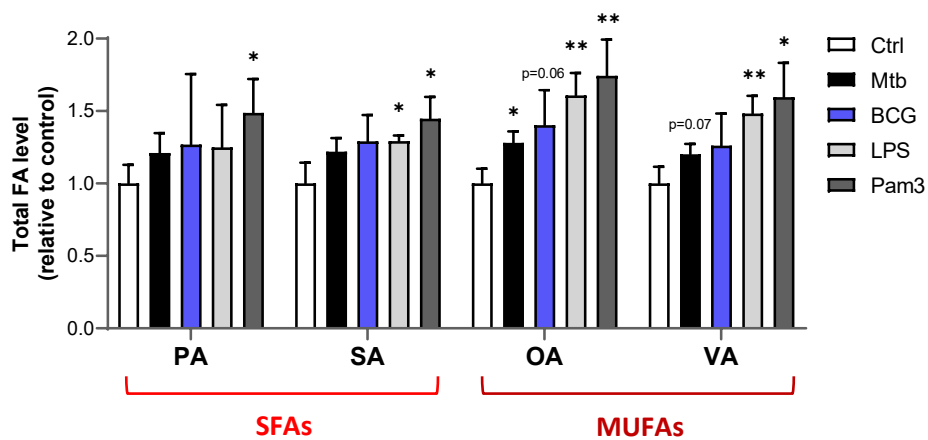**B**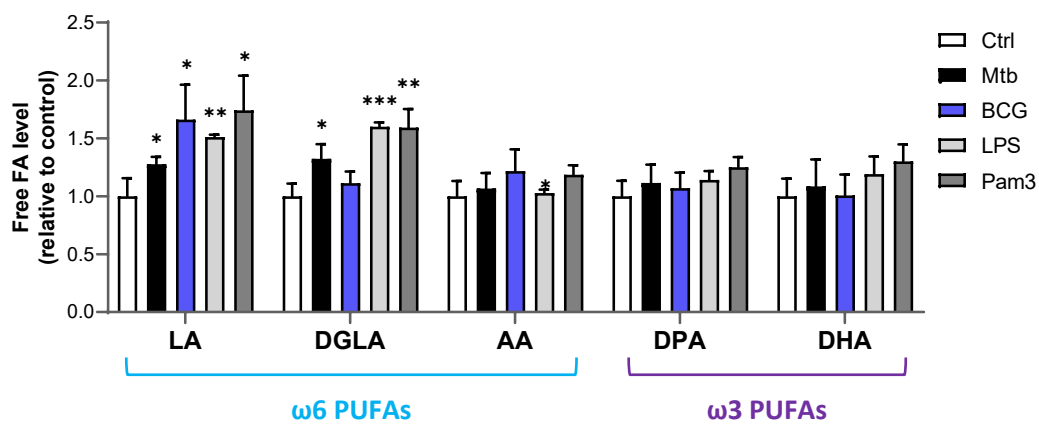

Supplement: supp [file elife_poa_e71946_Figure_1_figure_supplement_1.pdf › elife_poa_e71946_Figure_1_figure_supplement_1.pdf]

**A**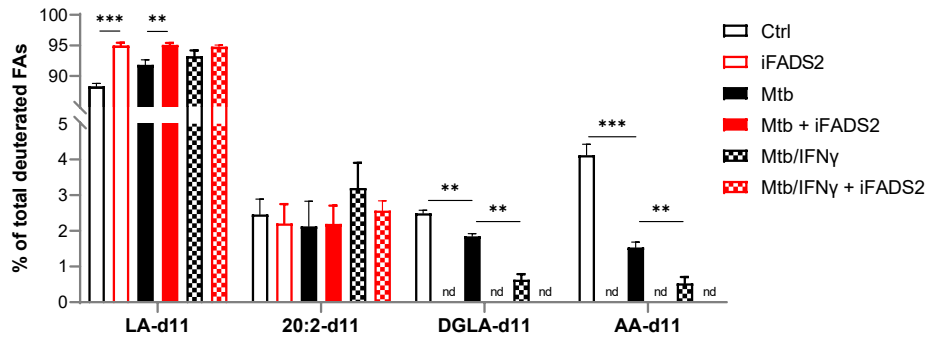**B**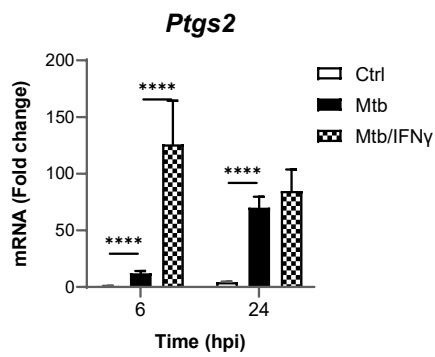**C**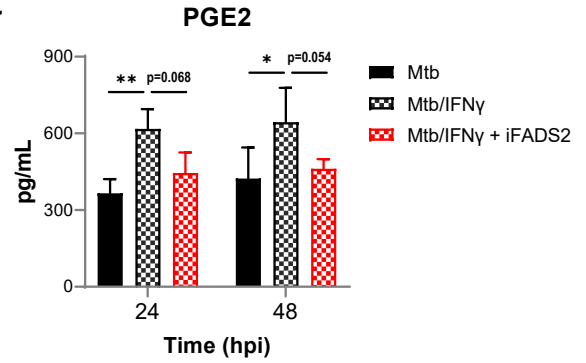**D**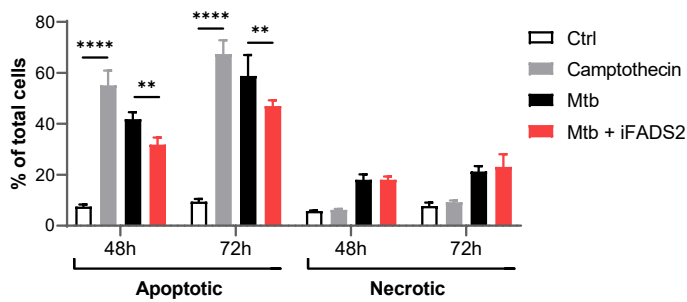**E**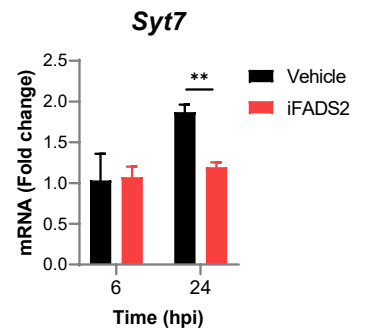

Supplement: supp [file elife_poa_e71946_Figure_3_figure_supplement_1.pdf › elife_poa_e71946_Figure_3_figure_supplement_1.pdf]

**A**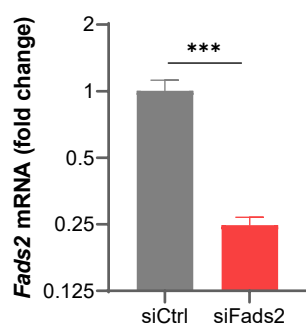**B**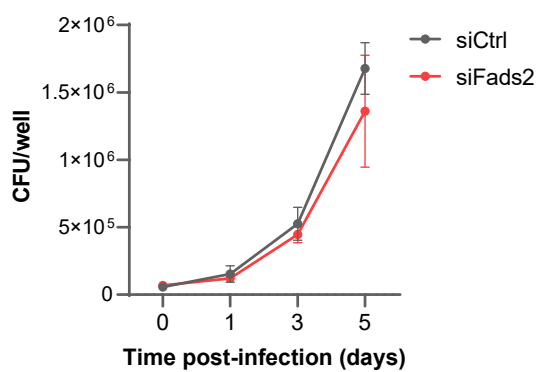**C**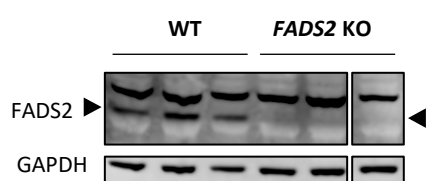**D**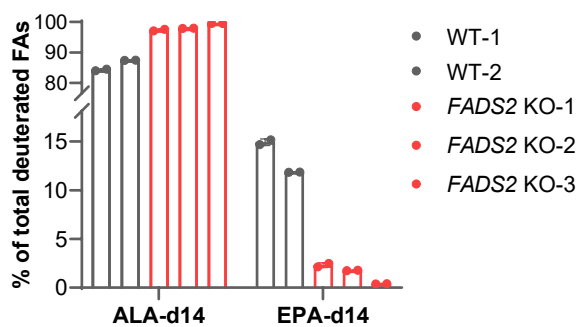

Supplement: supp [file elife_poa_e71946_Figure_4_figure_supplement_1.pdf › elife_poa_e71946_Figure_4_figure_supplement_1.pdf]

**A**

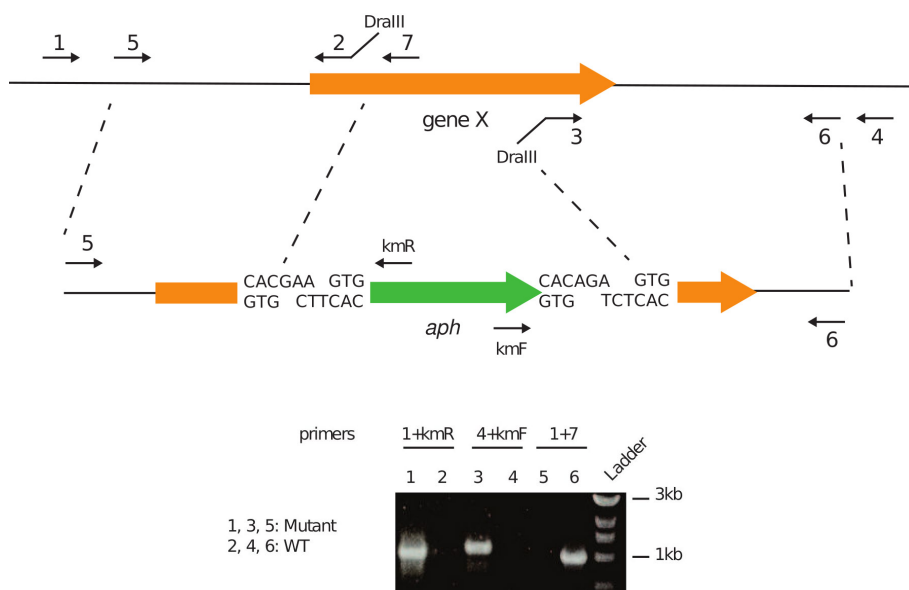

**B**

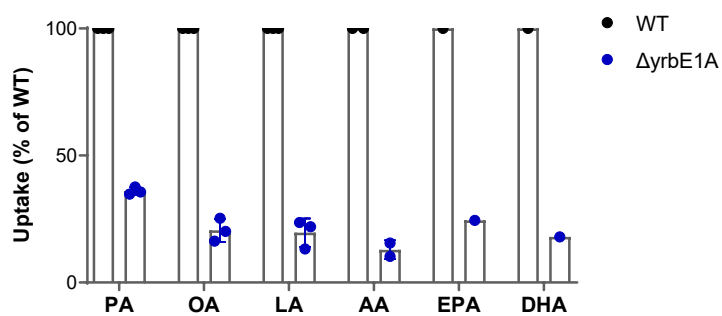

Supplement: supp [file elife_poa_e71946_Figure_5_figure_supplement_1.pdf › elife_poa_e71946_Figure_5_figure_supplement_1.pdf]

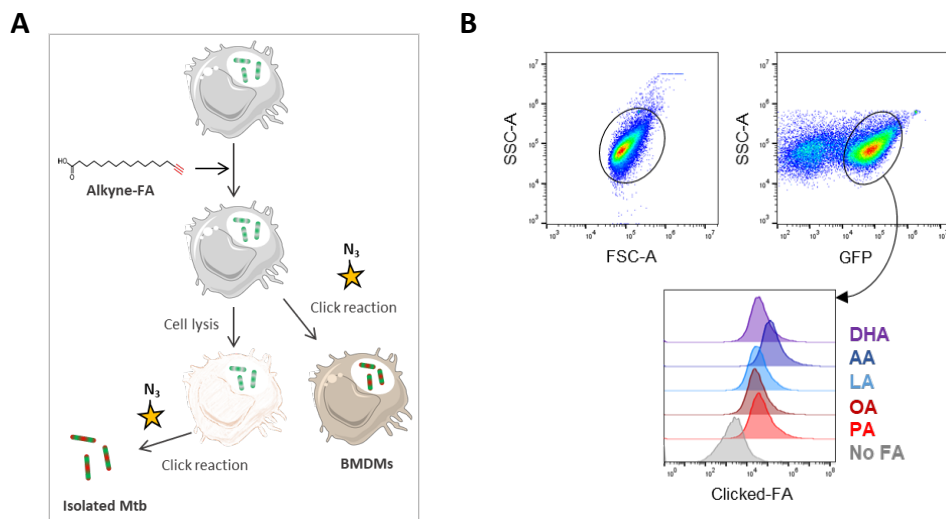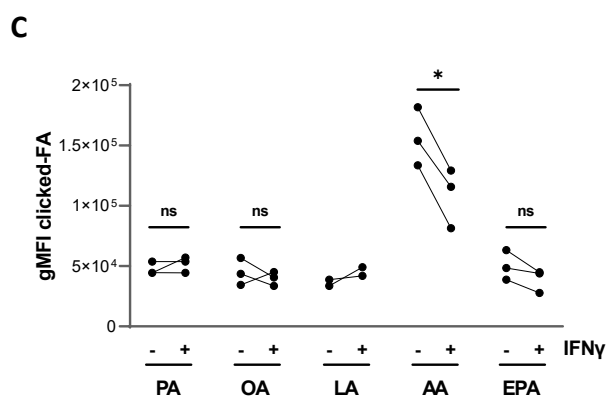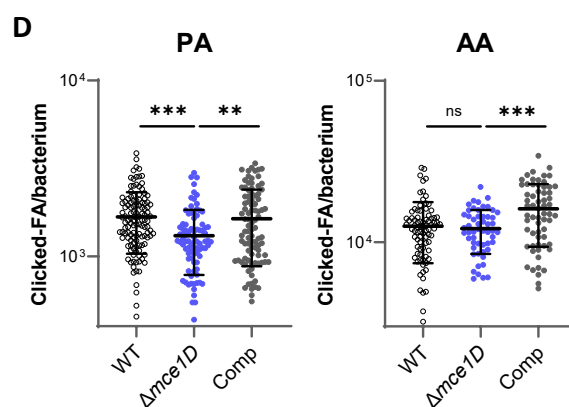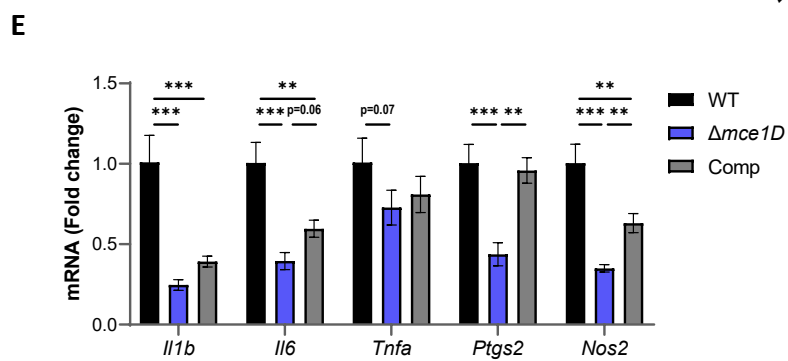

Supplement: supp [file elife_poa_e71946_Figure_6_figure_supplement_1.pdf › elife_poa_e71946_Figure_6_figure_supplement_1.pdf]

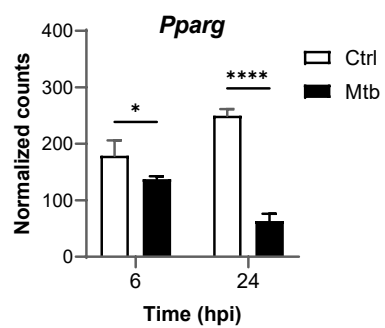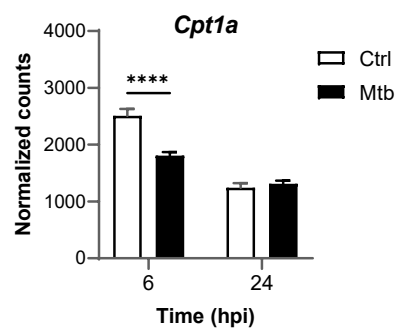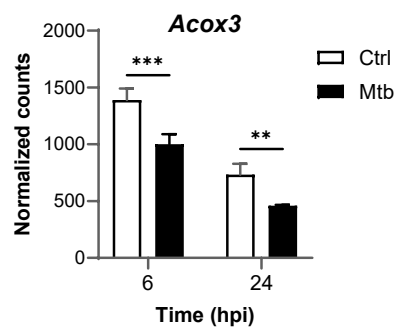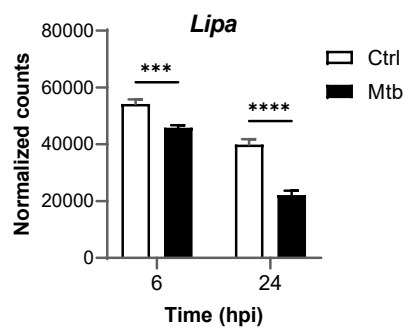

Supplement: supp [file elife_poa_e71946_Figure_6_figure_supplement_2.pdf › elife_poa_e71946_Figure_6_figure_supplement_2.pdf]
